# Supplementary material for: Optimization of graphene oxide-modified carbon-fiber microelectrode for dopamine detection
Source: Royal Society of Chemistry journal article supplement (doi:10.1039/d0ay00310g), 2020-01-01
Supplement: d0ay00310g1.pdf [file d0ay00310g1.pdf]

**Supporting Information for**

**Optimization of graphene oxide-modified carbon-fiber microelectrode for dopamine  
detection**

Yuanyu Chang and B. Jill Venton\*

Department of Chemistry, University of Virginia, Charlottesville, VA 22904, United States

email: [bjv2n@virginia.edu](mailto:bjv2n@virginia.edu)

phone: 434-243-2132

## Supplemental Data

### $\Delta E_p$ Comparison

$\Delta E_p$  was measured by calculating the difference of voltage position of oxidation peak and reduction peak in the cyclic voltammogram.

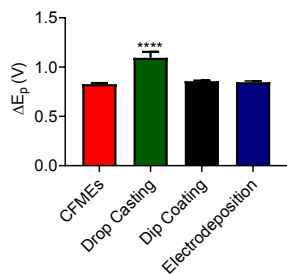

**Figure S1.** Average  $\Delta E_p$  by different coating method. (n=4–6, error bars represent SEM, one-way ANOVA with Bonferroni post-test compared to the control (red bars) \*\*\*\*p<0.0001)

### Drop Casting Optimization

0.1 mg/mL, 0.2 mg/mL, and 0.3 mg/mL GO solutions were prepared in the same way as mentioned in 2.2. However, 0.3 mg/mL by drop casting overloaded the amplifier of the device detection which could not be used in FSCV test.

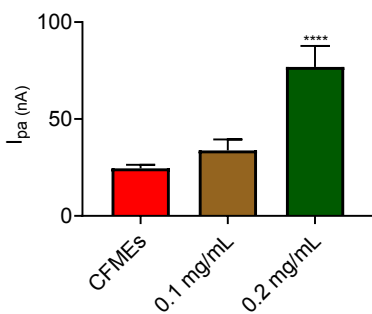

**Figure S2.** Average anodic peak current by drop casting in different concentration. (2 drops, 20  $\mu$ L per drop) (n=4–6, error bars represent SEM, one-way ANOVA with Bonferroni post-test compared to the control (red bars) \*\*\*\*p<0.0001)
